# Supplementary material
Source: PubMed Central journal article supplement (PMC8105007)
Supplement: AEM.01962-20-s0001.pdf [file AEM.01962-20-s0001.pdf]

## Supplemental materials

### Control of competence in *Vibrio fischeri*

Joshua J. Cohen<sup>1,2</sup>, Steven J. Eichinger<sup>1,2</sup>, Danae A. Witte<sup>3</sup>, Connor J. Cook<sup>3</sup>, Pat M. Fidopiastis<sup>4</sup>, Jovanka Tepavčević<sup>3</sup>, and Karen L. Visick<sup>1,5</sup>

<sup>1</sup>Loyola University Chicago, Maywood, IL

<sup>2</sup>These authors contributed equally to the work

<sup>3</sup>Wheaton College, Wheaton, IL

<sup>4</sup>California Polytechnic University, San Luis Obispo, CA

<sup>5</sup>Corresponding author

[kvisick@luc.edu](mailto:kvisick@luc.edu)

**Running title:** *V. fischeri* competence

**Key words:** Competence; *Vibrio fischeri*; *litR*; *hapR*; quorum sensing; luminescence

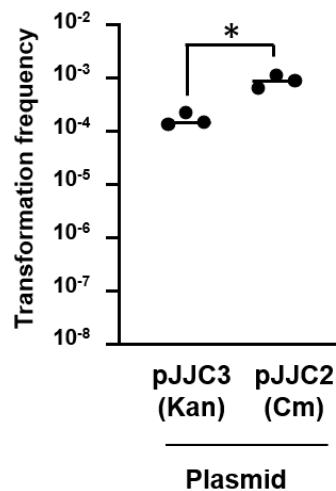

**Supplemental Figure 1. Cm<sup>R</sup>-encoding *tfoX* overexpression plasmids confer greater transformation frequencies relative to the Kan<sup>R</sup> derivatives.** Transformation frequencies (Trim<sup>R</sup> CFU/Viable CFU) of wild-type strain ES114 carrying the following plasmids: plostfoX-Cm, pJJC2 (Cm<sup>R</sup>), plostfoX-Kan, and pJJC3 (Kan<sup>R</sup>). For pJJC2 and pJJC3-containing strains, cells were grown in the presence of 0.2% arabinose to induce *tfoX* transcription from the arabinose-inducible promoter. All strains were exposed to gDNA from KV8300 (*fliQ*::Trim). \* p<0.05

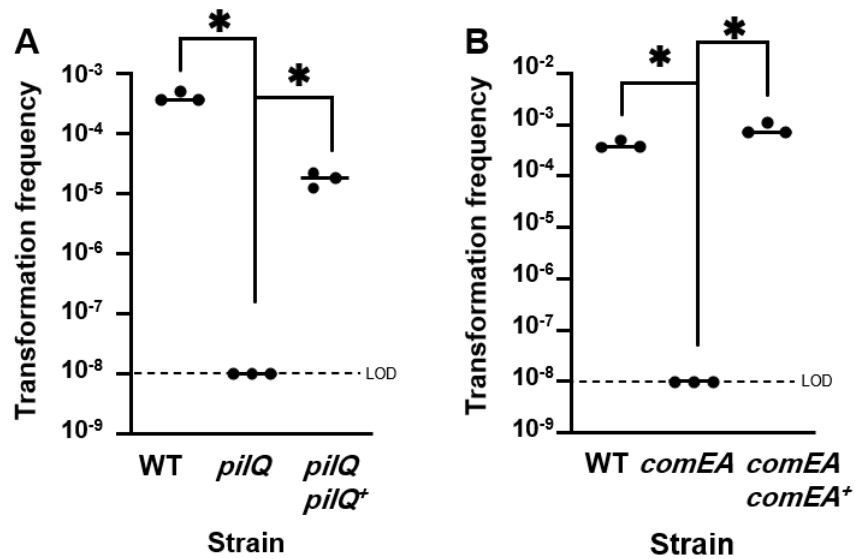

**Supplemental Figure 2. Competence defects of the *pilQ* and *comEA* mutants can be complemented.**

Transformation frequencies (Trim<sup>R</sup> CFU/Viable CFU) of plostfoX-Cm-containing wild-type, mutant, and complemented *V. fischeri* cells exposed to gDNA from KV8300 (*fliQ*::Trim). (A) Transformation frequencies of plostfoX-Cm-containing ES114 (WT), *pilQ*::mTn (*pilQ*; KV8879), and *pilQ*<sup>+</sup>-expressing *pilQ*::mTn (KV9633) strains. (B) Transformation frequencies of plostfoX-Cm-containing ES114 and  $\Delta$ *comEA* (KV9219), and *comEA*<sup>+</sup>-expressing  $\Delta$ *comEA* (KV9632) strains. The  $\Delta$ *pilQ* and  $\Delta$ *comEA* strains exhibited transformation frequencies below the limit of detection (LOD). \* p<0.05

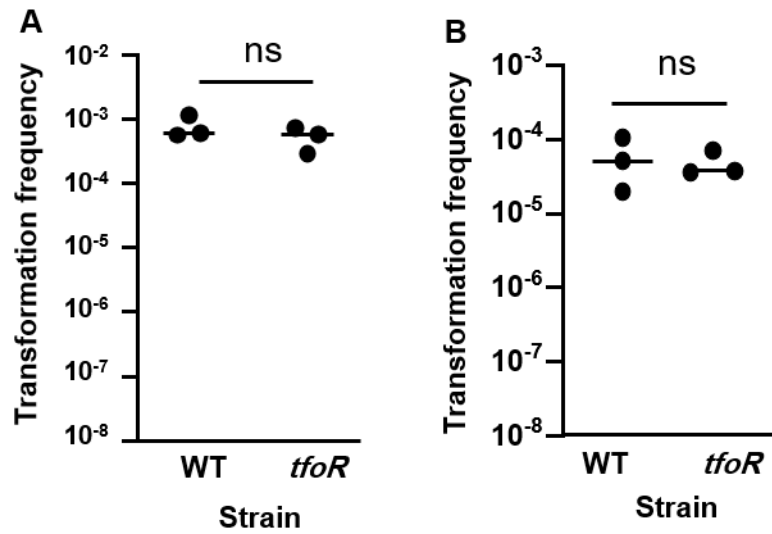

**Supplemental Figure 3. Loss of TfoR does not impact *V. fischeri* transformation under *tfoX*-overexpression conditions.** Transformation frequencies (total Trim<sup>R</sup> CFU/Viable CFU) of plostfoX-Cm- (A) or plostfoX-Kan- (B) containing wild-type (ES114) (WT) and the *tfoR* mutant (KV8162) (A) or KV9605 (B) strains exposed to gDNA from KV8300 (*fliQ*::Trim). ns, not significant

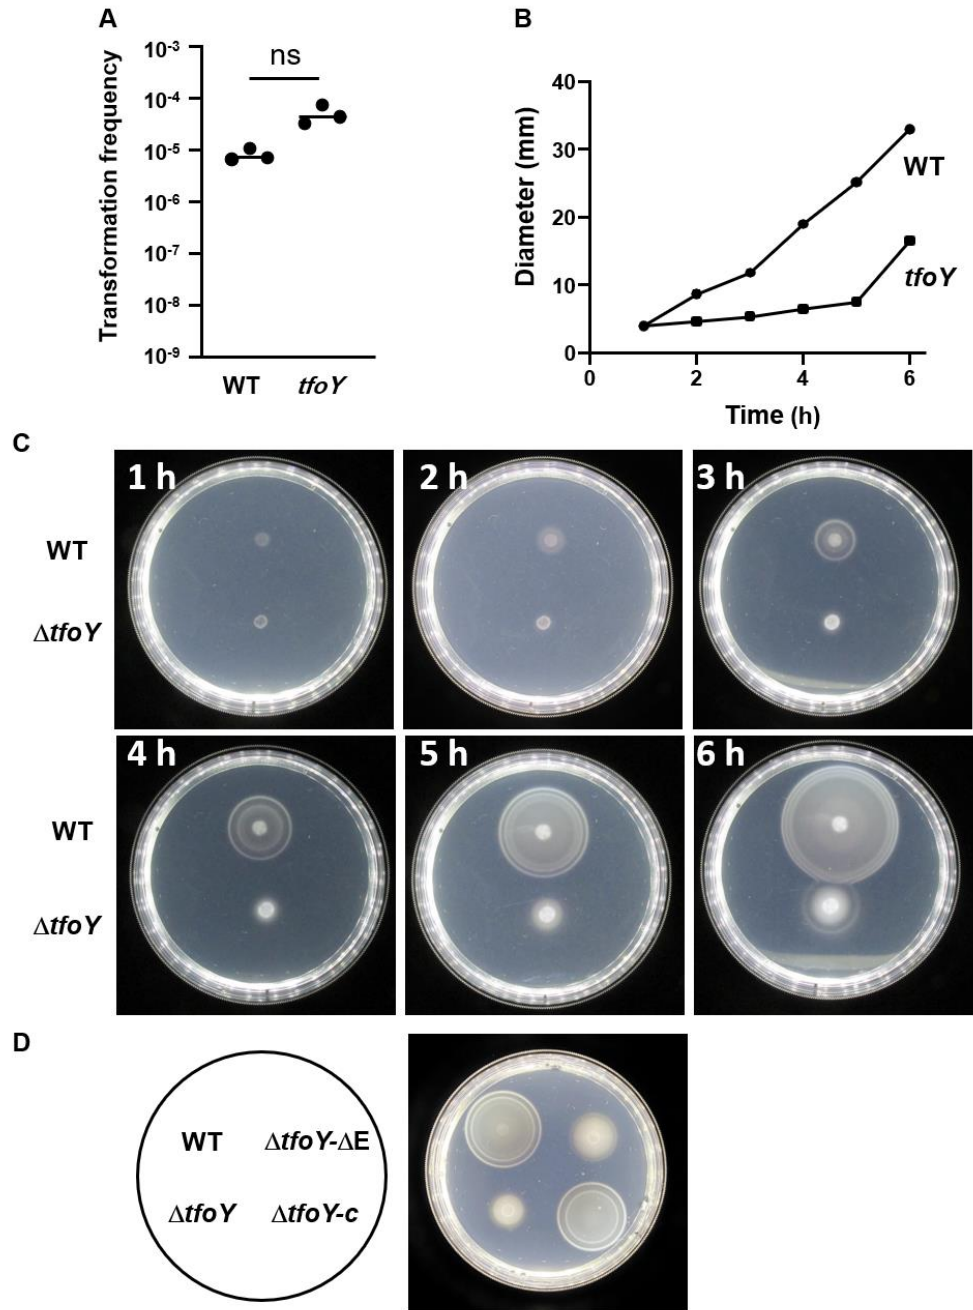

**Supplemental Figure 4. TfoY required for motility but not competence.** (A) Transformation frequencies (Total Trim<sup>R</sup> CFU/viable CFU) of plostfoX-Kan-containing wild-type (ES114) (WT) and *tfoY* mutant (KV9353) strains exposed to gDNA from KV8300 (*fliQ*::Trim). ns, not significant (B and C) Motility of ES114 and *tfoY* mutant (KV9353) strains in TBS + Mg soft agar plates. To observe and quantify migration patterns, photographs (B) and measurements (C) were taken hourly. (D) Cartoon of strain placement on motility agar (left) and **representative picture of the migration** (right) of ES114 (WT) and  $\Delta tfoY$  (Erm<sup>R</sup>) (KV9353) ( $\Delta tfoY$ ) strains along with Erm<sup>S</sup>  $\Delta tfoY$  derivative (KV9607) ( $\Delta tfoY-\Delta E$ ) and complemented *tfoY* mutant (KV9627) ( $\Delta tfoY-c$ ).

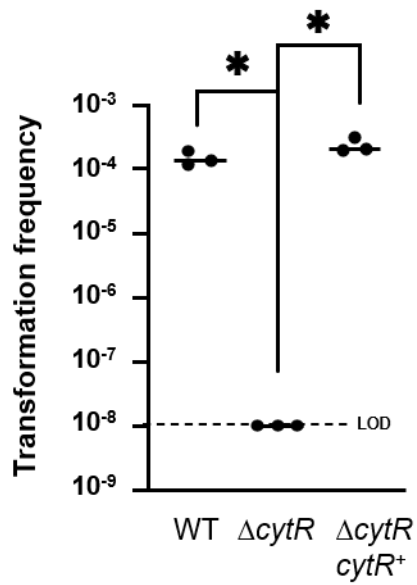

**Supplemental Figure 5. The competence defect of the *cytR* mutant can be complemented.** Transformation frequencies (Total Trim<sup>R</sup> CFU/viable CFU) of plostfoX-Cm-containing wild-type (WT) (ES114), Δ*cytR* (KV8840), and *cytR*<sup>+</sup> expressing Δ*cytR* mutant (KV9650) cells exposed to gDNA from KV8300 (*fliQ*::Trim). The Δ*cytR* mutant exhibited a transformation frequency below the limit of detection (LOD). \* p<0.05

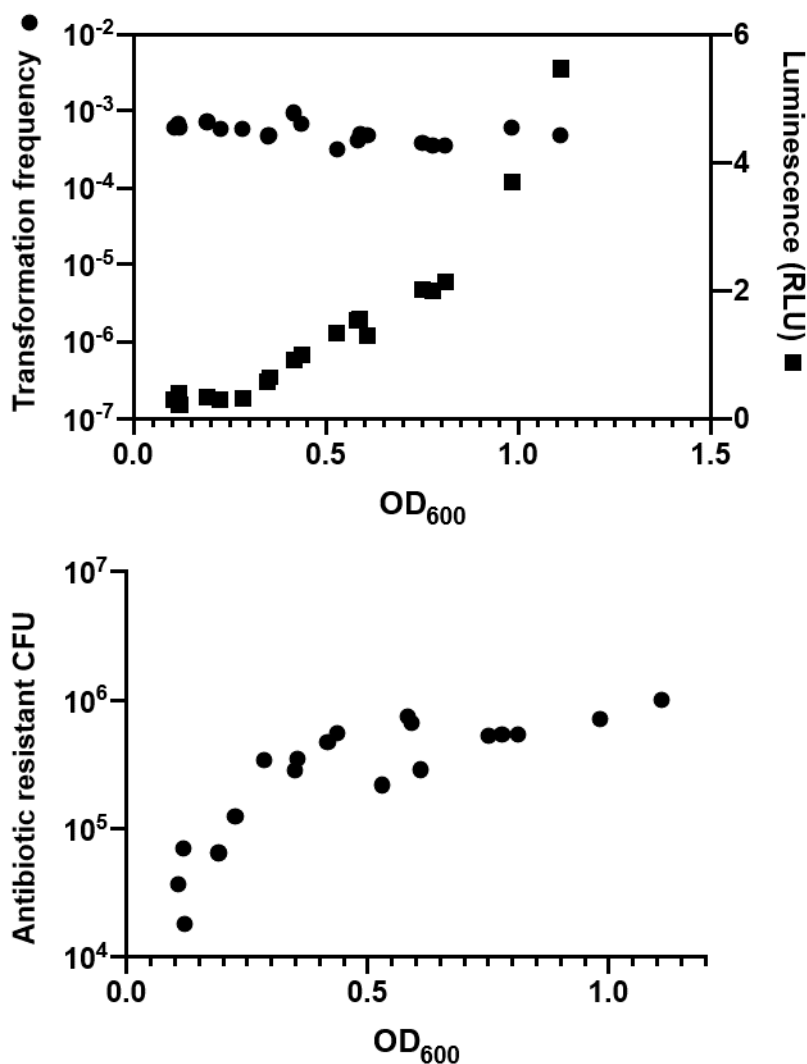

**Supplemental Figure 6. Transformation frequencies during *V. fischeri* growth.** The data from Figure 7 are combined here with a second experiment performed the same way. (A) Transformation frequencies (Trim<sup>R</sup> CFU/Viable CFU) (left Y-axis) (circles) and relative light units (RLU) (right Y-axis) (squares) of plostfoX-Cm-containing ES114 assessed at the indicated optical densities (OD<sub>600</sub>) during growth of *V. fischeri* in minimal medium. (B) The same transformation experiments as shown in panel A, plotted instead as numbers of transformants at each optical density (not normalized to total cell number) (circles). Cells were exposed to gDNA from KV8300 (*fliQ*::Trim). The data shown are from two combined experiments each performed by sampling from two flasks.

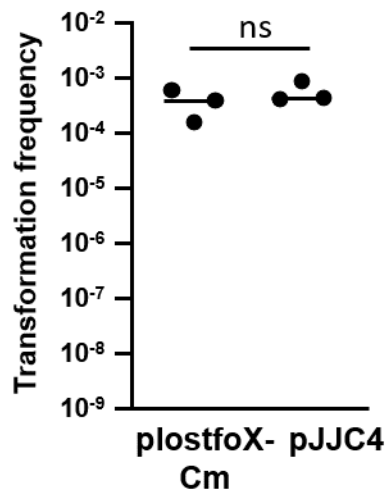

**Supplemental Figure 7. Transformation of ES114 containing pLostfoX-Cm or pJJC4.** Transformation frequencies (Trim<sup>R</sup> CFU/Viable CFU) of wild-type strain ES114 carrying plostfoX-Cm or pJJC4 (Cm<sup>R</sup>) were assessed following exposure to gDNA of KV8300 (*fliQ*::Trim). ns, not significant



## Supplemental Materials and Methods

Strain construction. Strains and plasmids used for work shown in the Supplemental data section are listed in Supplemental Tables 1 and 2, respectively. Primers used for their construction are listed in Supplemental Table 3. As needed, the  $\text{Erm}^{\text{R}}$  cassette was removed using the FLP recombinase protein expressed from plasmid pKV496 [1] by conjugation using *E. coli* strains carrying that plasmid and another carrying conjugal plasmid pEVS104 [2].

Strains for complementation experiments were generated as described in Visick et al., 2018 [1] with primers as indicated in Supplemental Table 3. Because this method uses  $\text{Erm}^{\text{R}}$  as a selectable marker, the  $\text{Erm}^{\text{R}}$  resistance marker was removed from the *tfoY* mutant before the  $\text{Erm}^{\text{R}}$ -marked complement was introduced. The *pilQ*, *comEA*, and *cytR* mutants were not able to be transformed. Therefore, the  $\text{Erm}^{\text{R}}$ -marked mutations were instead introduced into strains that carried the corresponding gene complement lacking the associated  $\text{Erm}^{\text{R}}$  marker. For example, the *pilQ*::FRT- $\text{Erm}^{\text{R}}$  mutation was introduced into a strain that carried a wild-type copy of *pilQ* at the *yeiR-glmS* region [1].

Plasmid construction. For plasmids pJJC2 and pJJC3, a PCR product was first cloned into pJET1.2 using the Thermo Scientific™ CloneJET PCR cloning kit. pJJC2 was derived from plostfoX-Cm digested with KpnI and SacI, which removes the *tfoX* gene, and ligated with a KpnI and SacI-digested DNA fragment containing *araC* and *Para-tfoX*. This DNA fragment was derived from a PCR SOE reaction using EMD Millipore KOD DNA polymerase using primer sets 2764 & 2765 (with template pSW7848 [3]) and 2766 & 2767 (with template ES114), that was cloned into pJET1.2. pJJC3 was made in the same way, except that plostfoX-Kan was used as the vector.

Arabinose-inducible plasmid transformations. *V. fischeri* strain ES114 carrying pJJC2 ( $\text{Cm}^{\text{R}}$ ) or pJJC3 ( $\text{Kan}^{\text{R}}$ ), which contain *tfoX* under the control of an arabinose-inducible promoter, were grown overnight in TMM containing 5  $\mu\text{g/ml}$  Cm or 100  $\mu\text{g/ml}$  Kan, respectively. The strains were subcultured in the same medium, but supplemented with arabinose at a final concentration of 0.5%. As with the other experimental transformations reported in the main text, the strains were grown until an  $\text{OD}_{600}$  between 0.5 and 0.7 was achieved and transformed with 500 ng of genomic DNA from KV8300 ( $\Delta\text{fliQ}$ ::FRT-Trim $^{\text{R}}$ ).

Motility experiments. For motility experiments, *V. fischeri* was grown in TBS broth, which contains 1% Difco tryptone and 2% sodium chloride, and inoculated onto TBS containing 35 mM MgSO<sub>4</sub>, solidified with 0.3% agar (final concentration) [4, 5]. Wild-type and *tfoY* mutant (KV9353) cells were grown overnight in TBS at 28C, then subcultured in the same medium for 1-2 h at 28 degrees. An aliquot (10 µl) of cells normalized to a similar OD<sub>600</sub> (equal to about 0.2) were spotted onto TBS soft agar plates (solidified with 0.3% agar (final concentration)) that contained 35 mM MgSO<sub>4</sub> [5]. Migration was examined over time and photos were taken at a representative point.

**Supplemental Table 1. Strains used for work shown in the Supplemental data section**

| Strain | Genotype <sup>1</sup>                                                                        | Derivation or description <sup>2,3</sup>                                                                                        | Source or Reference |
|--------|----------------------------------------------------------------------------------------------|---------------------------------------------------------------------------------------------------------------------------------|---------------------|
| ES114  | Wild Type                                                                                    | N/A                                                                                                                             | [6]                 |
| KV8162 | $\Delta tfoR::FRT$ -Erm                                                                      | TT ES114 with PCR SOE generated with primer sets 2270 & 2271 (ES114), 2089 & 2090 (pKV494), and 2272 & 2273 (ES114)             | This study          |
| KV8232 | IG ( <i>yeiR-glmS</i> )::Erm <sup>R</sup> Trim <sup>R</sup>                                  | Parent strain for inserting complementing genes into the <i>V. fischeri</i> genome                                              | [1]                 |
| KV8300 | $\Delta fliQ::FRT$ -Trim                                                                     | N/A                                                                                                                             | [1]                 |
| KV8399 | $\Delta fliQ::FRT$ IG ( <i>yeiR</i> -FRT-Erm/ <i>glmS</i> )::P <sub>nrdr</sub> - <i>fliQ</i> | Template for PCR for inserting complements at the <i>yeiR-glmS</i> intergenic (IG) region, used in lieu of pKV506 and/or pKV503 | [1]                 |
| KV8840 | $\Delta cytR::FRT$ -Erm                                                                      | See Table 1, main document                                                                                                      | This study          |
| KV8879 | <i>pilQ</i> ::mTn5                                                                           | See Table 1, main document                                                                                                      | This study          |
| KV9219 | $\Delta comEA::FRT$ -Erm                                                                     | See Table 1, main document                                                                                                      | This study          |
| KV9353 | $\Delta tfoY::FRT$ -Erm                                                                      | TT ES114 with PCR SOE with primers 2777 & 2778 (ES114), 2089 & 2090 (pKV494), and 2779 & 2780 (ES114)                           | This study          |
| KV9605 | $\Delta tfoR::FRT$                                                                           | Introduction of pKV496 into KV8162 to remove Erm <sup>R</sup> cassette                                                          | This study          |

|        |                                                            |                                                                                                                                                                 |            |
|--------|------------------------------------------------------------|-----------------------------------------------------------------------------------------------------------------------------------------------------------------|------------|
| KV9607 | $\Delta tfoY::FRT$                                         | Introduction of pKV496 into KV9353 to remove $Erm^R$ cassette                                                                                                   | This study |
| KV9620 | IG ( <i>yeiR-glmS</i> ):: $P_{nrdR-tfoY^+}$<br>[ $Erm^R$ ] | TT KV8232 with PCR SOE with primers 2290 & 2090 (pKV506), 2951 & 2952 (ES114), and 2196 & 1487 (pKV503)                                                         | This study |
| KV9627 | $\Delta tfoY::FRT P_{nrdR-tfoY^+}$                         | TT KV9607 with gKV9620                                                                                                                                          | This study |
| KV9628 | IG ( <i>yeiR-glmS</i> ):: $P_{nrdR-comEA^+}$               | TT KV8232 with PCR SOE with primers 2290 & 2090 (KV8399), 2949 & 2950 (ES114), and 2196 & 1487 (KV8399), then introduction of pKV496 to remove $Erm^R$ cassette | This study |
| KV9629 | IG ( <i>yeiR-glmS</i> ):: $P_{nrdR-pilQ^+}$                | TT KV8232 with PCR SOE with primers 2290 & 2090 (KV8399), 2963 & 2964 (ES114), and 2196 & 1487 (KV8399), then introduction of pKV496 to remove $Erm^R$ cassette | This study |
| KV9632 | $P_{nrdR-comEA^+} \Delta comEA::FRT-$<br>$Erm^R$           | TT KV9628 with gKV9219                                                                                                                                          | This study |
| KV9633 | $P_{nrdR-pilQ^+} \Delta pilQ::mTn5$                        | TT KV9629 with gKV8879                                                                                                                                          | This study |
| KV9638 | IG ( <i>yeiR-glmS</i> ):: $P_{nrdR-cytR^+}$                | TT KV8232 with PCR SOE with primers 2290 & 2090 (KV8399), 2947 & 2948 (ES114), and 2196 & 1487 (KV8399), then                                                   | This study |

|        |                                                                              |                                                               |            |
|--------|------------------------------------------------------------------------------|---------------------------------------------------------------|------------|
|        |                                                                              | introduction of pKV496 to remove Erm <sup>R</sup><br>cassette |            |
| KV9650 | P <sub>nrdr-cytR</sub> <sup>+</sup> Δ <sub>cytR</sub> ::FRT-Erm <sup>R</sup> | TT KV9638 with gKV8840                                        | This study |

<sup>1</sup>IG, intergenic region between the genes in parentheses

<sup>2</sup>TfoX-induced Transformation (TT) was performed with *tfoX* overexpressing versions of the indicated strains using either PCR SOE DNA or genomic (g) DNA from the indicated strain

<sup>3</sup>pKV496 was introduced into strains by conjugation as described in the Supplemental Methods section

**Supplemental Table 2. Plasmids used for work shown in the Supplemental data section**

| Plasmid | Description                                                                      | Resistance marker | Source or Reference |
|---------|----------------------------------------------------------------------------------|-------------------|---------------------|
| pEVS104 | Conjugal plasmid                                                                 | Kan               | [2]                 |
| pJJC2   | plostfoX-Cm <sup>1</sup> with <i>tfoX</i> replaced with <i>Para-tfoX</i>         | Cm                | This study          |
| pJJC3   | plostfoX-Kan with <i>tfoX</i> replaced with <i>Para-tfoX</i>                     | Kan               | This study          |
| pKV496  | pJET + FLP recombinase gene                                                      | Kan               | [1]                 |
| pKV503  | pJET + <i>glmS</i> sequences + linker                                            | Ap                | [1]                 |
| pKV506  | pJET + <i>yeiR</i> , erm <sup>R</sup> , and P <sub>nrdr</sub> sequences + linker | Ap, Erm           | [1]                 |
| pSW7848 | Suicide vector; used as source of <i>araC Para</i>                               | Cm                | [3]                 |

**Supplemental Table 3: Primers used for the construction of strains and plasmids used for work shown exclusively in the Supplemental data section**

| Primer Number | Purpose                           | Sequence <sup>1</sup>                                 |
|---------------|-----------------------------------|-------------------------------------------------------|
| 1487          | Amplify <i>glmS</i>               | GGTCGTGGGGAGTTTTATCC                                  |
| 2090          | Amplify Erm <sup>R</sup>          | CCATGGCCTTCTAGGCCTATCC                                |
| 2196          | Amplify <i>glmS</i>               | TCCATACTTAGTGCGGCCGCCTA                               |
| 2270          | Delete <i>tfoR</i>                | CCAAGAATGGTTATTAAAAGTCTACC                            |
| 2271          | Delete <i>tfoR</i>                | taggcggccgcactaagtatggCCCATCCGATTAATAACTCATATTGAACCCC |
| 2272          | Delete <i>tfoR</i>                | ggataggcctagaaggccatggCGATGTAATTAACTATAACTGC          |
| 2273          | Delete <i>tfoR</i>                | CCATTAACCTCTTTCTTGTGTCGGTTGG                          |
| 2290          | Amplify Erm <sup>R</sup>          | AAGAAACCGATACCGTTTACG                                 |
| 2764          | Clone <i>araC</i> and <i>Para</i> | aaagagctcTCGTTACCAATTATGACAACCTTGACG                  |
| 2765          | Clone <i>araC</i> and <i>Para</i> | aaaattgacctcctAACGGGTATGGAGAAACAGTAGAG                |
| 2766          | O/E <i>tfoX</i> with strong RBS   | cccgttaggaggTCAATTTTATGACAGGGACGGG                    |
| 2767          | O/E <i>tfoX</i> with strong RBS   | aaaggtaccATTTGTTTCGGTATAACGAGG                        |
| 2777          | Delete <i>tfoY</i>                | TGAAATGCAACCAGAGGTTGTTACAC                            |
| 2778          | Delete <i>tfoY</i>                | taggcggccgcactaagtatggAGACGAAGTGAGTCTTTTAATACTGG      |
| 2779          | Delete <i>tfoY</i>                | ggataggcctagaaggccatggGTAATTTCTGCCGAAACACGTAATGAA     |
| 2780          | Delete <i>tfoY</i>                | CTGTTGTTATTGCGATGCAAGCTG                              |
| 2947          | Complement <i>cytR</i>            | ggataggcctagaaggccatggATGGACTTTAGATATTGAGCCAC         |
| 2948          | Complement <i>cytR</i>            | taggcggccgcactaagtatggaCGTGGCTTAAAGAATGAATCGAG        |
| 2949          | Complement <i>comEA</i>           | ggataggcctagaaggccatggGCGTTCTCAAACCTCAGCAAG           |
| 2950          | Complement <i>comEA</i>           | taggcggccgcactaagtatggaTTGTACCAATGAGCTGATTAGC         |
| 2951          | Complement <i>tfoY</i>            | ggataggcctagaaggccatggGTAGTAGTGTTCAAACCGCC            |
| 2952          | Complement <i>tfoY</i>            | taggcggccgcactaagtatggaGAGCCTGTAGATTAAGGCTG           |
| 2963          | Complement <i>pilQ</i>            | ggataggcctagaaggccatggAGGATTAGGAATCTCTCATGTCTG        |
| 2964          | Complement <i>pilQ</i>            | taggcggccgcactaagtatggaCATGCTGAATTTGAATACTATCTC       |

<sup>1</sup>Lowercase letters indicate non-native sequences

## References

1. **Visick, K.L., K.M. Hodge-Hanson, A.H. Tischler, A.K. Bennett, and V. Mastrodomenico.** 2018. Tools for rapid genetic engineering of *Vibrio fischeri*. *Appl Environ Microbiol* **84**(14): p. e00850-18.
2. **Stabb, E.V. and E.G. Ruby.** 2002. RP4-based plasmids for conjugation between *Escherichia coli* and members of the Vibrionaceae. *Methods Enzymol* **358**: p. 413-26.
3. **Val, M.E., O. Skovgaard, M. Ducos-Galand, M.J. Bland, and D. Mazel.** 2012. Genome engineering in *Vibrio cholerae*: a feasible approach to address biological issues. *PLoS Genet* **8**(1): p. e1002472.
4. **DeLoney-Marino, C.R., A.J. Wolfe, and K.L. Visick.** 2003. Chemoattraction of *Vibrio fischeri* to serine, nucleosides, and N-acetylneuraminic acid, a component of squid light-organ mucus. *Appl Environ Microbiol* **69**(12): p. 7527-30.
5. **O'Shea, T.M., C.R. Deloney-Marino, S. Shibata, S. Aizawa, A.J. Wolfe, and K.L. Visick.** 2005. Magnesium promotes flagellation of *Vibrio fischeri*. *J Bacteriol* **187**(6): p. 2058-65.
6. **Boettcher, K.J. and E.G. Ruby.** 1990. Depressed light emission by symbiotic *Vibrio fischeri* of the sepiolid squid *Euprymna scolopes*. *J Bacteriol* **172**(7): p. 3701-6.
